# Supplementary material for: Genomic Regions and Candidate Genes Linked to Capped Hock in Pig
Source: MDPI journal article supplement (doi:10.3390/life11060510), 2021-05-31
Supplement: s1 [file s1]

## Article

# Genomic Regions and Candidate Genes Linked to Capped Hock in Pig

Lyubov Getmantseva <sup>1,\*</sup>, Maria Kolosova <sup>1,2</sup>, Faridun Bakoev <sup>1</sup>, Anna Zimina <sup>1,\*</sup>, and Siroj Bakoev <sup>1,3</sup>

<sup>1</sup> Federal Research Center for Animal Husbandry named after Academy Member L.K. Ernst, Dubrovitsy 142132, Russia; m.leonovaa@mail.ru (M.K.) bakoevfaridun@yandex.ru (F.B.); siroj1@yandex.ru (S.B.)

<sup>2</sup> Department of Biotechnology, Don State Agrarian University, Persianovski 346493, Russia

<sup>3</sup> Centre for Strategic Planning and Management of Biomedical Health Risks, Moscow 123182, Russia

\* Correspondence: ilonaluba@mail.ru (L.G.); filipchenko-90@mail.ru (A.Z.); Tel.: +7-(4967)-65-11-01 (L.G. and A.Z.)

**Abstract:** Capped hock affects the exterior of pedigree pigs, making them unsalable and resulting in a negative impact on the efficiency of pig-breeding centers. The purpose of this paper was to carry out pilot studies aimed at finding genomic regions and genes linked to the capped hock in pigs. The studies were carried out on Landrace pigs (n = 75) and Duroc pigs (n = 70). To identify genomic regions linked to capped hock in pigs, we used smoothing FST statistics. Genotyping was performed with GeneSeek® GGP Porcine HD Genomic Profiler v1 (Illumina Inc, USA). The research results showed 70 SNPs linked to capped hock in Landrace (38 SNPs) and Duroc (32 SNPs). The identified regions overlapped with QTLs related with health traits (blood parameters) and meat and carcass traits (fatness). In total, 31 genes were identified (i.e., 17 genes in Landrace, 14 genes in Durocs). Three genes appeared in both the Landrace and Duroc groups, including A2ML1 (SSC5), ROBO2 (SSC13), and MSI1 (SSC14). We identified genomic regions directly or indirectly linked to capped hock, which thus might contribute to identifying genetic variants and using them as genetic markers in pig breeding.

**Keywords:** pig; capped hock; selection signatures; genome; candidate genes; A2ML1; ROBO2; MSI1

**Citation:** Getmantseva, L.; Kolosova, M.; Bakoev, F.; Zimina, A.; Bakoev, S. Genomic Regions and Candidate Genes Linked to Capped Hock in Pig. *Life* **2021**, *11*, 510. <https://doi.org/10.3390/life11060510>

Academic Editors: Yuriy Lvovich Orlov and Anastasia A. Anashkina

Received: 22 April 2021

Accepted: 28 May 2021

Published: 31 May 2021

**Publisher's Note:** MDPI stays neutral with regard to jurisdictional claims in published maps and institutional affiliations.

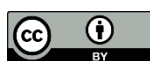

**Copyright:** © 2021 by the authors. Licensee MDPI, Basel, Switzerland. This article is an open access article distributed under the terms and conditions of the Creative Commons Attribution (CC BY) license (<http://creativecommons.org/licenses/by/4.0/>).

## Supplementary Materials:

Table S1. SNPs with the most significant signals in L\_I vs L\_II.

| Uploaded Variation   | Chr | Location  | SYMBOL | Existing Variation |
|----------------------|-----|-----------|--------|--------------------|
| MARC0030993          | 1   | 17549870  | SASH1  | rs80969276         |
| ALGA0103472          | 2   | 39626373  | NAV2   | rs81330475         |
| WU_10.2_2_128186090  | 2   | 122874593 | DTWD2  | rs334355498        |
| WU_10.2_2_146797370  | 2   | 141009508 | SIL1   | rs320190225        |
| MARC0073571          | 4   | 119421277 | -      | rs80849125         |
| WU_10.2_5_65456803   | 5   | 62626025  | A2ML1  | rs341331983        |
| ALGA0041880          | 7   | 49887262  | -      | rs80994093         |
| ASGA0038682          | 8   | 36628170  | -      | rs81399897         |
| DRGA0008554          | 8   | 36640393  | -      | rs81301907         |
| ASGA0038686          | 8   | 36694976  | -      | rs81399904         |
| MARC0083335          | 9   | 85218746  | -      | rs81266663         |
| ASGA0051491          | 11  | 65796898  | HS6ST3 | rs80999276         |
| MARC0003871          | 11  | 66242426  | -      | rs81227709         |
| ASGA0091209          | 11  | 66385031  | MBNL2  | rs81477757         |
| MARC0046077          | 12  | 33946887  | MSI2   | rs81237783         |
| WU_10.2_12_41135707  | 12  | 39566229  | -      | rs318621721        |
| ALGA0120101          | 13  | 178817874 | ROBO2  | rs81327419         |
| ALGA0074279          | 14  | 1594168   | -      | rs80831536         |
| WU_10.2_14_1958251   | 14  | 1707134   | -      | rs325491375        |
| WU_10.2_14_5494122   | 14  | 5211273   | -      | rs335163579        |
| WU_10.2_14_25998805  | 14  | 24451474  | RIMBP2 | rs338806883        |
| ASGA0062222          | 14  | 24472907  | RIMBP2 | rs80931297         |
| ALGA0076318          | 14  | 24580553  | RIMBP2 | rs80976116         |
| MARC0079723          | 14  | 40329970  | MSI1   | rs81264077         |
| ASGA0062993          | 14  | 41641323  | -      | rs80783712         |
| ALGA0077159          | 14  | 41697208  | -      | rs80983909         |
| ALGA0077175          | 14  | 41894877  | SVOP   | rs80863866         |
| H3GA0039979          | 14  | 42273660  | SART3  | rs80827280         |
| MARC0004842          | 14  | 42353262  | -      | rs80970794         |
| ASGA0063071          | 14  | 42910896  | SGSM1  | rs80905649         |
| ALGA0078910          | 14  | 74444995  | CDH23  | rs80965661         |
| WU_10.2_15_143794446 | 15  | 129863001 | -      | rs334067331        |
| SIRI0001312          | 15  | 130037634 | -      | rs318303466        |
| MARC0090673          | 15  | 130082478 | PID1   | rs81272043         |
| ASGA0071304          | 15  | 130450029 | DNER   | rs81455786         |
| WU_10.2_17_8800657   | 17  | 7921242   | -      | rs321482623        |
| WU_10.2_17_14603707  | 17  | 13757956  | -      | rs320374299        |
| WU_10.2_17_47910100  | 17  | 42408936  | -      | rs341759761        |

SSC – Sus scrofa chromosome.

Table S2. QTLs, determined in L\_I vs L\_II.

| ID QTL | SSC | Trait                                     | Class                  | Group                  |
|--------|-----|-------------------------------------------|------------------------|------------------------|
| 15128  | 15  | Bilirubin level                           | Blood parameters       | Health Traits          |
| 16335  | 2   | Backfat at tenth rib                      | Fatness                | Meat and carcass trait |
| 18087  | 14  | Total number born alive                   | Litter traits          | Reproduction traits    |
| 18128  | 5   | Number of stillborn                       | Litter traits          | Reproduction traits    |
| 22138  | 8   | Mean corpuscular hemoglobin concentration | Blood parameters       | Health Traits          |
| 22144  | 8   | Mean corpuscular volume                   | Blood parameters       | Health Traits          |
| 22145  | 8   | Red blood cell count                      | Blood parameters       | Health Traits          |
| 22147  | 8   | Red blood cell count                      | Blood parameters       | Health Traits          |
| 22162  | 8   | Mean corpuscular hemoglobin concentration | Blood parameters       | Health Traits          |
| 22164  | 8   | Mean corpuscular volume                   | Blood parameters       | Health Traits          |
| 22165  | 8   | Red blood cell count                      | Blood parameters       | Health Traits          |
| 22168  | 8   | Platelet distribution width               | Blood parameters       | Health Traits          |
| 23157  | 17  | Backfat thickness between 3rd and 4th rib | Fatness                | Meat and carcass trait |
| 23164  | 17  | Backfat thickness between 3rd and 4th rib | Fatness                | Meat and carcass trait |
| 30994  | 15  | Maternal infanticide                      | Behavioral             | Exterior traits        |
| 31840  | 2   | Corpus luteum number                      | Litter traits          | Reproduction traits    |
| 32128  | 14  | Linoleic acid content                     | Fatty acid content     | Meat and carcass trait |
| 64761  | 11  | Spinal curvature                          | Defects                | Exterior traits        |
| 65002  | 2   | Heart weight                              | Anatomy                | Meat and carcass trait |
| 66275  | 1   | Body weight                               | Growth                 | Production traits      |
| 95692  | 1   | Ham weight                                | Anatomy                | Meat and carcass trait |
| 106221 | 2   | Piglet mortality                          | Litter traits          | Reproduction traits    |
| 121898 | 12  | Meat color b*                             | Meat color             | Meat and carcass trait |
| 125483 | 9   | Intramuscular fat content                 | Fatness                | Meat and carcass trait |
| 126142 | 2   | Conformation score                        | Conformation           | Exterior traits        |
| 126624 | 14  | Teat number                               | Reproductive organ     | Reproduction traits    |
| 126660 | 8   | Teat number                               | Reproductive organ     | Reproduction traits    |
| 126705 | 14  | Teat number difference between sides      | Reproductive organ     | Reproduction traits    |
| 126735 | 14  | Left teat number                          | Reproductive organ     | Reproduction traits    |
| 140352 | 9   | PRRSV susceptibility                      | Disease susceptibility | Health Traits          |
| 161332 | 15  | Conductivity 45 minutes post-mortem       | Conductivity impedance | Meat and carcass trait |
| 161367 | 15  | Hair amount                               | Coat characteristics   | Exterior traits        |
| 161368 | 15  | Hair amount                               | Coat characteristics   | Exterior traits        |
| 161369 | 15  | Hair amount                               | Coat characteristics   | Exterior traits        |
| 161370 | 15  | Hair amount                               | Coat characteristics   | Exterior traits        |
| 167228 | 15  | pH 24 hr post-mortem loin                 | pH                     | Meat and carcass trait |
| 167229 | 15  | Cooking yield                             | Texture                | Meat and carcass trait |
| 167230 | 15  | Drip loss                                 | Texture                | Meat and carcass trait |
| 167231 | 15  | muscle protein percentage                 | Chimistry              | Meat and carcass trait |
| 170629 | 15  | Average backfat thickness                 | Fatness                | Meat and carcass trait |
| 170646 | 15  | Lean meat percentage                      | Fatness                | Meat and carcass trait |
| 170898 | 15  | Days to 100 kg                            | Growth                 | Production traits      |
| 170991 | 14  | Basophil number                           | Immune capacity        | Health Traits          |
| 170992 | 14  | Basophil number                           | Immune capacity        | Health Traits          |
| 170993 | 14  | Basophil number                           | Immune capacity        | Health Traits          |
| 170994 | 14  | Basophil number                           | Immune capacity        | Health Traits          |
| 170995 | 14  | Basophil number                           | Immune capacity        | Health Traits          |
| 170996 | 14  | Basophil number                           | Immune capacity        | Health Traits          |
| 170997 | 14  | Basophil number                           | Immune capacity        | Health Traits          |
| 170998 | 14  | Basophil number                           | Immune capacity        | Health Traits          |
| 170999 | 14  | Basophil number                           | Immune capacity        | Health Traits          |
| 171000 | 14  | Basophil number                           | Immune capacity        | Health Traits          |
| 171001 | 14  | Basophil number                           | Immune capacity        | Health Traits          |

[illegible]

| ID QTL | SSC | Trait                                     | Class            | Group               |
|--------|-----|-------------------------------------------|------------------|---------------------|
| 171058 | 14  | Basophil number                           | Immune capacity  | Health Traits       |
| 171059 | 14  | Basophil number                           | Immune capacity  | Health Traits       |
| 171060 | 14  | Basophil number                           | Immune capacity  | Health Traits       |
| 171061 | 14  | Basophil number                           | Immune capacity  | Health Traits       |
| 171062 | 14  | Basophil number                           | Immune capacity  | Health Traits       |
| 171063 | 14  | Basophil number                           | Immune capacity  | Health Traits       |
| 171064 | 14  | Basophil number                           | Immune capacity  | Health Traits       |
| 171065 | 14  | Basophil number                           | Immune capacity  | Health Traits       |
| 171066 | 14  | Basophil number                           | Immune capacity  | Health Traits       |
| 171067 | 14  | Basophil number                           | Immune capacity  | Health Traits       |
| 171068 | 14  | Basophil number                           | Immune capacity  | Health Traits       |
| 171069 | 14  | Basophil number                           | Immune capacity  | Health Traits       |
| 171070 | 14  | Basophil number                           | Immune capacity  | Health Traits       |
| 171071 | 14  | Basophil number                           | Immune capacity  | Health Traits       |
| 171072 | 14  | Basophil number                           | Immune capacity  | Health Traits       |
| 171073 | 14  | Basophil number                           | Immune capacity  | Health Traits       |
| 171074 | 14  | Basophil number                           | Immune capacity  | Health Traits       |
| 171075 | 14  | Basophil number                           | Immune capacity  | Health Traits       |
| 171090 | 14  | LDL cholesterol                           | Blood parameters | Health Traits       |
| 171093 | 14  | Mean corpuscular hemoglobin content       | Blood parameters | Health Traits       |
| 171095 | 14  | Mean corpuscular hemoglobin concentration | Blood parameters | Health Traits       |
| 171103 | 14  | Blood non-esterified fatty acid level     | Blood parameters | Health Traits       |
| 171104 | 14  | Blood non-esterified fatty acid level     | Blood parameters | Health Traits       |
| 171105 | 14  | Blood non-esterified fatty acid level     | Blood parameters | Health Traits       |
| 171106 | 14  | Blood non-esterified fatty acid level     | Blood parameters | Health Traits       |
| 171107 | 14  | Blood non-esterified fatty acid level     | Blood parameters | Health Traits       |
| 171108 | 14  | Blood non-esterified fatty acid level     | Blood parameters | Health Traits       |
| 171109 | 14  | Blood non-esterified fatty acid level     | Blood parameters | Health Traits       |
| 171110 | 14  | Blood non-esterified fatty acid level     | Blood parameters | Health Traits       |
| 171111 | 14  | Blood non-esterified fatty acid level     | Blood parameters | Health Traits       |
| 171120 | 14  | Bilirubin level                           | Blood parameters | Health Traits       |
| 171144 | 5   | Blood urea level                          | Blood parameters | Health Traits       |
| 178883 | 14  | Number of mummified pigs                  | Litter traits    | Reproduction traits |
| 178884 | 14  | Number of mummified pigs                  | Litter traits    | Reproduction traits |
| 178885 | 14  | Number of mummified pigs                  | Litter traits    | Reproduction traits |
| 179299 | 14  | Litter weight total                       | Litter traits    | Reproduction traits |
| 179305 | 14  | Litter size                               | Litter traits    | Reproduction traits |
| 179306 | 14  | Litter size                               | Litter traits    | Reproduction traits |

SSC – Sus scrofa chromosome.

**Table S3.** SNPs with the most significant signals in D\_I vs D\_II.

| Uploaded_Variation  | SSC | Location  | SYMBOL  | Existing_Variation |
|---------------------|-----|-----------|---------|--------------------|
| WU_10.2_10_6743776  | 10  | 5059529   | -       | rs81427537         |
| WU_10.2_11_5321086  | 11  | 5634464   | FLT1    | rs324295783        |
| MARC0046077         | 12  | 33946887  | MSI2    | rs81237783         |
| WU_10.2_13_9673699  | 13  | 8427269   | ZNF385D | rs327907552        |
| WU_10.2_13_9726957  | 13  | 8480553   | ZNF385D | rs332080276        |
| WU_10.2_13_9767339  | 13  | 8520901   | ZNF385D | rs328536473        |
| WU_10.2_13_9782147  | 13  | 8535711   | ZNF385D | rs319396990        |
| WU_10.2_13_9873963  | 13  | 8628750   | -       | rs341648836        |
| WU_10.2_13_9919470  | 13  | 8690551   | -       | rs331208680        |
| ALGA0116253         | 13  | 23544359  | SCN10A  | rs81478668         |
| ALGA0113417         | 13  | 23581312  | -       | rs81342178         |
| WU_10.2_13_25818975 | 13  | 23600960  | SCN11A  | rs346314104        |
| ASGA0100028         | 13  | 23669797  | SCN11A  | rs81478395         |
| WU_10.2_13_25953293 | 13  | 23693721  | SCN11A  | rs339492216        |
| H3GA0035852         | 13  | 23741303  | WDR48   | rs81443702         |
| ASGA0056686         | 13  | 23765878  | WDR48   | rs81286678         |
| ASGA0056707         | 13  | 23800213  | TTC21A  | rs81278459         |
| ALGA0068887         | 13  | 23857751  | -       | rs81443711         |
| ALGA0120101         | 13  | 178817874 | ROBO2   | rs81327419         |
| WU_10.2_14_5494122  | 14  | 5211273   | -       | rs335163579        |
| WU_10.2_16_6524638  | 16  | 6079228   | MYO10   | rs338457670        |
| ALGA0090202         | 16  | 33611061  | -       | rs81458369         |
| ALGA0018559         | 3   | 36808586  | RBFOX1  | rs81369266         |
| WU_10.2_3_126402455 | 3   | 118364336 | -       | rs80881141         |
| WU_10.2_5_65456803  | 5   | 62626025  | A2ML1   | rs341331983        |
| ALGA0041880         | 7   | 49887262  | -       | rs80994093         |
| WU_10.2_7_102488461 | 7   | 96694364  | NUMB    | rs329434246        |
| WU_10.2_8_29947191  | 8   | 28581006  | -       | rs339146187        |
| MARC0083335         | 9   | 85218746  | -       | rs81266663         |
| WU_10.2_9_120099467 | 9   | 109160356 | -       | rs341080205        |
| WU_10.2_9_140916040 | 9   | 128362353 | KCNK2   | rs326736106        |
| WU_10.2_9_144258473 | 9   | 131211605 | DTL     | rs326767944        |

SSC – Sus scrofa chromosome.

Table S4. QTLs, determined in D\_I vs D\_II.

| ID QTL | SSC | Trait                                 | Class                  | Group                  |
|--------|-----|---------------------------------------|------------------------|------------------------|
| 18128  | 5   | Number of stillborn                   | Litter traits          | Reproduction traits    |
| 18134  | 13  | Number of stillborn                   | Litter traits          | Reproduction traits    |
| 18648  | 3   | androstenone laboratory               | Chemistry              | Meat and carcass trait |
| 29611  | 9   | Body weight weaning                   | Growth                 | Production traits      |
| 32075  | 8   | Palmitic acid content                 | Fatty acid content     | Meat and carcass trait |
| 32128  | 14  | Linoleic acid content                 | Fatty acid content     | Meat and carcass trait |
| 55880  | 11  | Cryptorchidism                        | Reproductive organ     | Reproduction traits    |
| 55881  | 11  | Cryptorchidism                        | Reproductive organ     | Reproduction traits    |
| 95388  | 16  | Arachidic acid content                | Fatty acid content     | Meat and carcass trait |
| 107244 | 16  | Hematocrit                            | Blood parameters       | Health Traits          |
| 107323 | 16  | Red blood cell count                  | Blood parameters       | Health Traits          |
| 121898 | 12  | Meat color b*                         | Meat color             | Meat and carcass trait |
| 125483 | 9   | Intramuscular fat content             | Fatness                | Meat and carcass trait |
| 126115 | 3   | Top line conformation                 | Conformation           | Exterior traits        |
| 126657 | 7   | Left teat number                      | Reproductive organ     | Reproduction traits    |
| 126682 | 7   | Teat number                           | Reproductive organ     | Reproduction traits    |
| 135646 | 9   | Daily feed intake                     | Feed intake            | Production traits      |
| 139179 | 10  | Lean meat percentage                  | Fatness                | Meat and carcass trait |
| 139189 | 9   | Backfat between 3rd and 4th last ribs | Fatness                | Meat and carcass trait |
| 140352 | 9   | PRRSV susceptibility                  | Disease susceptibility | Health Traits          |
| 147209 | 3   | Cannon bone circumference             | Conformation           | Exterior traits        |
| 147212 | 3   | Chest circumference                   | Growth                 | Production traits      |
| 147273 | 3   | Intramuscular fat content             | Fatness                | Meat and carcass trait |
| 147274 | 3   | Intramuscular fat content             | Fatness                | Meat and carcass trait |
| 147275 | 3   | Intramuscular fat content             | Fatness                | Meat and carcass trait |
| 147276 | 3   | Intramuscular fat content             | Fatness                | Meat and carcass trait |
| 147277 | 3   | Intramuscular fat content             | Fatness                | Meat and carcass trait |
| 147278 | 3   | Intramuscular fat content             | Fatness                | Meat and carcass trait |
| 147279 | 3   | Intramuscular fat content             | Fatness                | Meat and carcass trait |
| 147280 | 3   | Intramuscular fat content             | Fatness                | Meat and carcass trait |
| 147281 | 3   | Intramuscular fat content             | Fatness                | Meat and carcass trait |
| 147282 | 3   | Intramuscular fat content             | Fatness                | Meat and carcass trait |
| 147283 | 3   | Intramuscular fat content             | Fatness                | Meat and carcass trait |
| 147284 | 3   | Intramuscular fat content             | Fatness                | Meat and carcass trait |
| 147285 | 3   | Intramuscular fat content             | Fatness                | Meat and carcass trait |
| 147286 | 3   | Intramuscular fat content             | Fatness                | Meat and carcass trait |
| 147287 | 3   | Intramuscular fat content             | Fatness                | Meat and carcass trait |
| 147288 | 3   | Intramuscular fat content             | Fatness                | Meat and carcass trait |
| 147289 | 3   | Intramuscular fat content             | Fatness                | Meat and carcass trait |
| 147290 | 3   | Intramuscular fat content             | Fatness                | Meat and carcass trait |
| 147291 | 3   | Intramuscular fat content             | Fatness                | Meat and carcass trait |
| 147292 | 3   | Intramuscular fat content             | Fatness                | Meat and carcass trait |
| 147293 | 3   | Intramuscular fat content             | Fatness                | Meat and carcass trait |
| 164851 | 16  | pH 24 hr post-mortem loin             | pH                     | Meat and carcass trait |
| 167224 | 11  | Dressing percentage                   | Anatomy                | Meat and carcass trait |
| 167225 | 7   | Number of ribs                        | Anatomy                | Meat and carcass trait |
| 171144 | 5   | Blood urea level                      | Blood parameters       | Health Traits          |
| 171149 | 7   | Hemoglobin                            | Blood parameters       | Health Traits          |
| 179299 | 14  | Litter weight total                   | Litter traits          | Reproduction traits    |
